# Supplementary material
Source: publisher site journal article supplement (https://www.dovepress.com/get_supplementary_file.php?f=432683.docx)
Supplement: Supplementary file 1 [file get_supplementary_file.php]

***Real-World Evaluation of a Pharmacoinvasive Strategy for STEMI in Latin America: A Cost-Effective Approach with Short-Term Benefits***

***Supplementary:***

**Table S1.** ICER cost difference and effect difference in the cohort for outcomes

| **Length of stay** | **ICER ($ USD/Effect)** | **Cost difference ($ USD)** | **Effect difference (days)** |
| --- | --- | --- | --- |
| **PI vs pPCI** | -765.99 (-4,020.68, 3,141.65) | -215.58 (-601.41, 171.10) | 0.28 (-0.71,1.31) |
| **PI vs NR** | -283.40(-304.95, -252.76) | -1,221.69 (896.22, 1,567.181) | 4.31 (3.44-5.21) |
| **30-day mortality** | **ICER ($ USD/Effect)** | **Cost difference ($ USD)** | **Effect difference (%)** |
| **PI vs pPCI** | -129.50 (-810.57, 455.06) | -215.58 (-601.41, 171.10) | 1.64 (-1.05, 4.43) |
| **PI vs NR** | -165.27 (-224.06, -123.52) | -1,221.69 (896.22, 1,567.181) | 7.39 (4.91, 10.26) |
| **MACE** | **ICER ($ USD/Effect)** | **Cost difference ($ USD)** | **Effect difference (%)** |
| **PI vs pPCI** | -35.81 (-114.73, 64.81) | -215.58 (-601.41, 171.10) | 4.5 (1.23, 10.74) |
| **PI vs NR** | -271.60(-1,086.10, -144.93) | -1,221.69 (896.22, 1,567.181) | 6.02 (0.61, 8.63) |

PI, pharmacoinvasive strategy; pPCI, primary percutaneous coronary intervention; NR, non-reperfused; USD, US dollars.

.


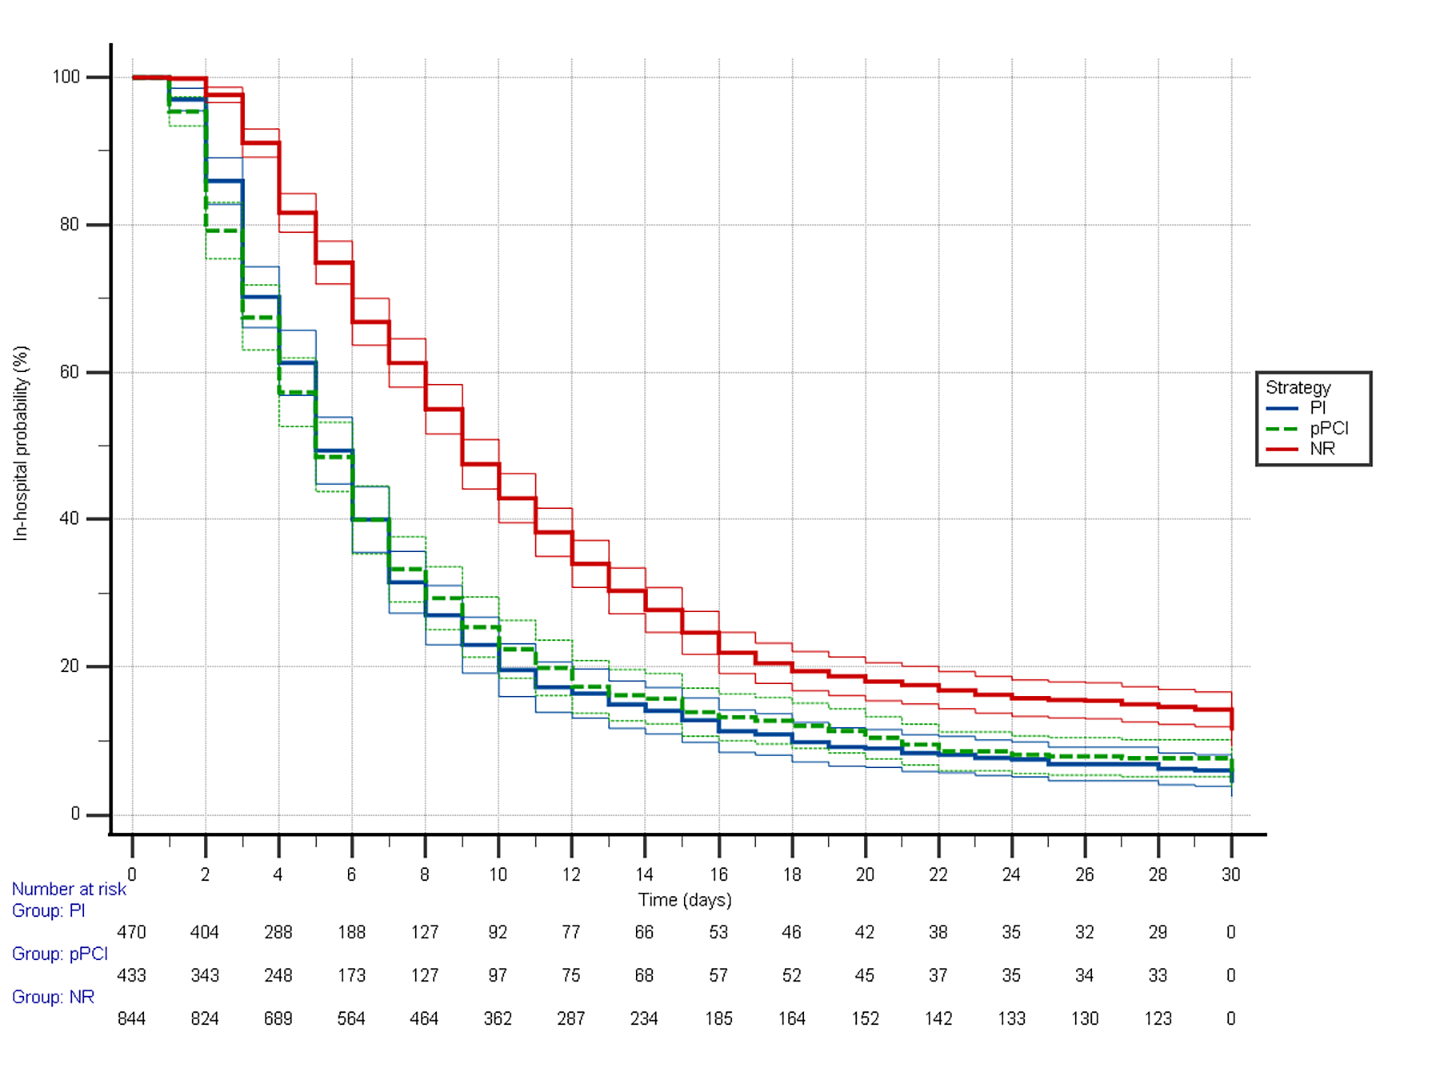


**Figure S1.** Comparison of length of stay by treatment strategy.

PI, pharmacoinvasive strategy; pPCI, primary percutaneous coronary intervention; NR, non-reperfused.


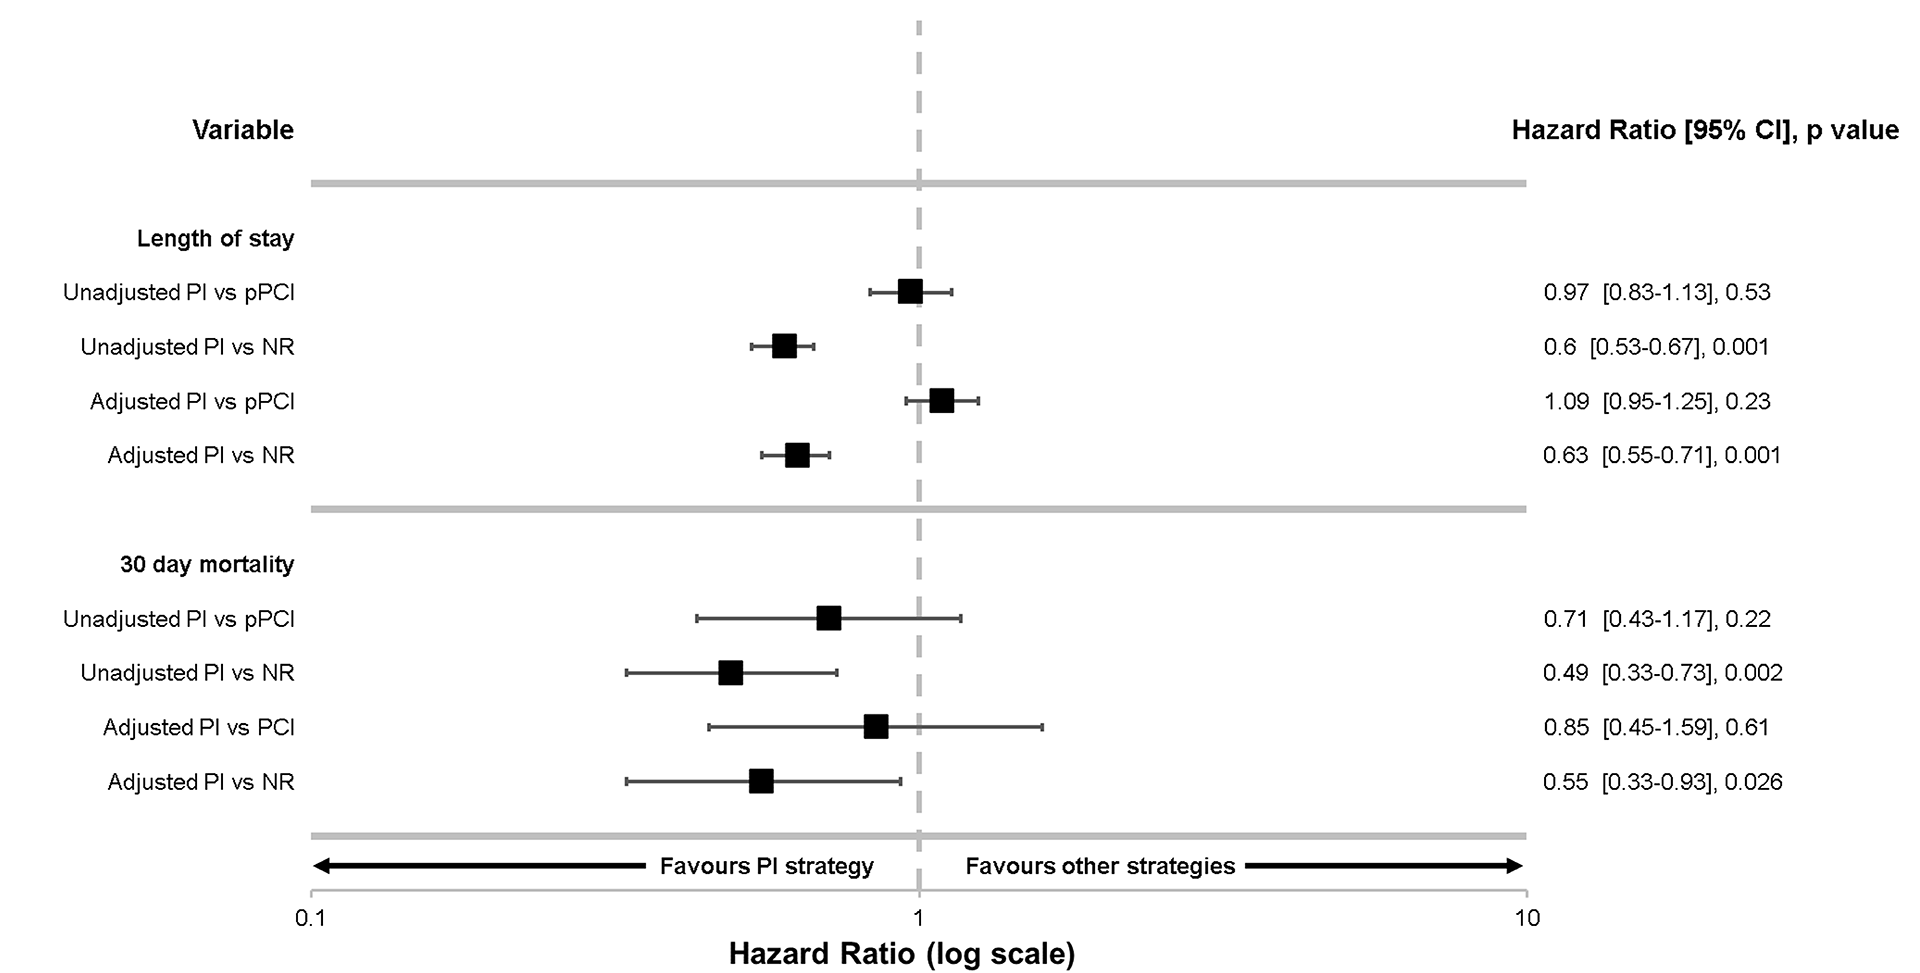


**Figure S2.** Forest plot of Cox proportional hazard multivariable modeling on length of stay and mortality. Adjusted by age, sex, diabetes, active smoking status, Killip–Kimball score, history of acute myocardial infarction, heart failure, TIMI risk score, MACE, in-hospital stay, and mortality. PI, pharmacoinvasive strategy; pPCI, primary percutaneous coronary intervention.


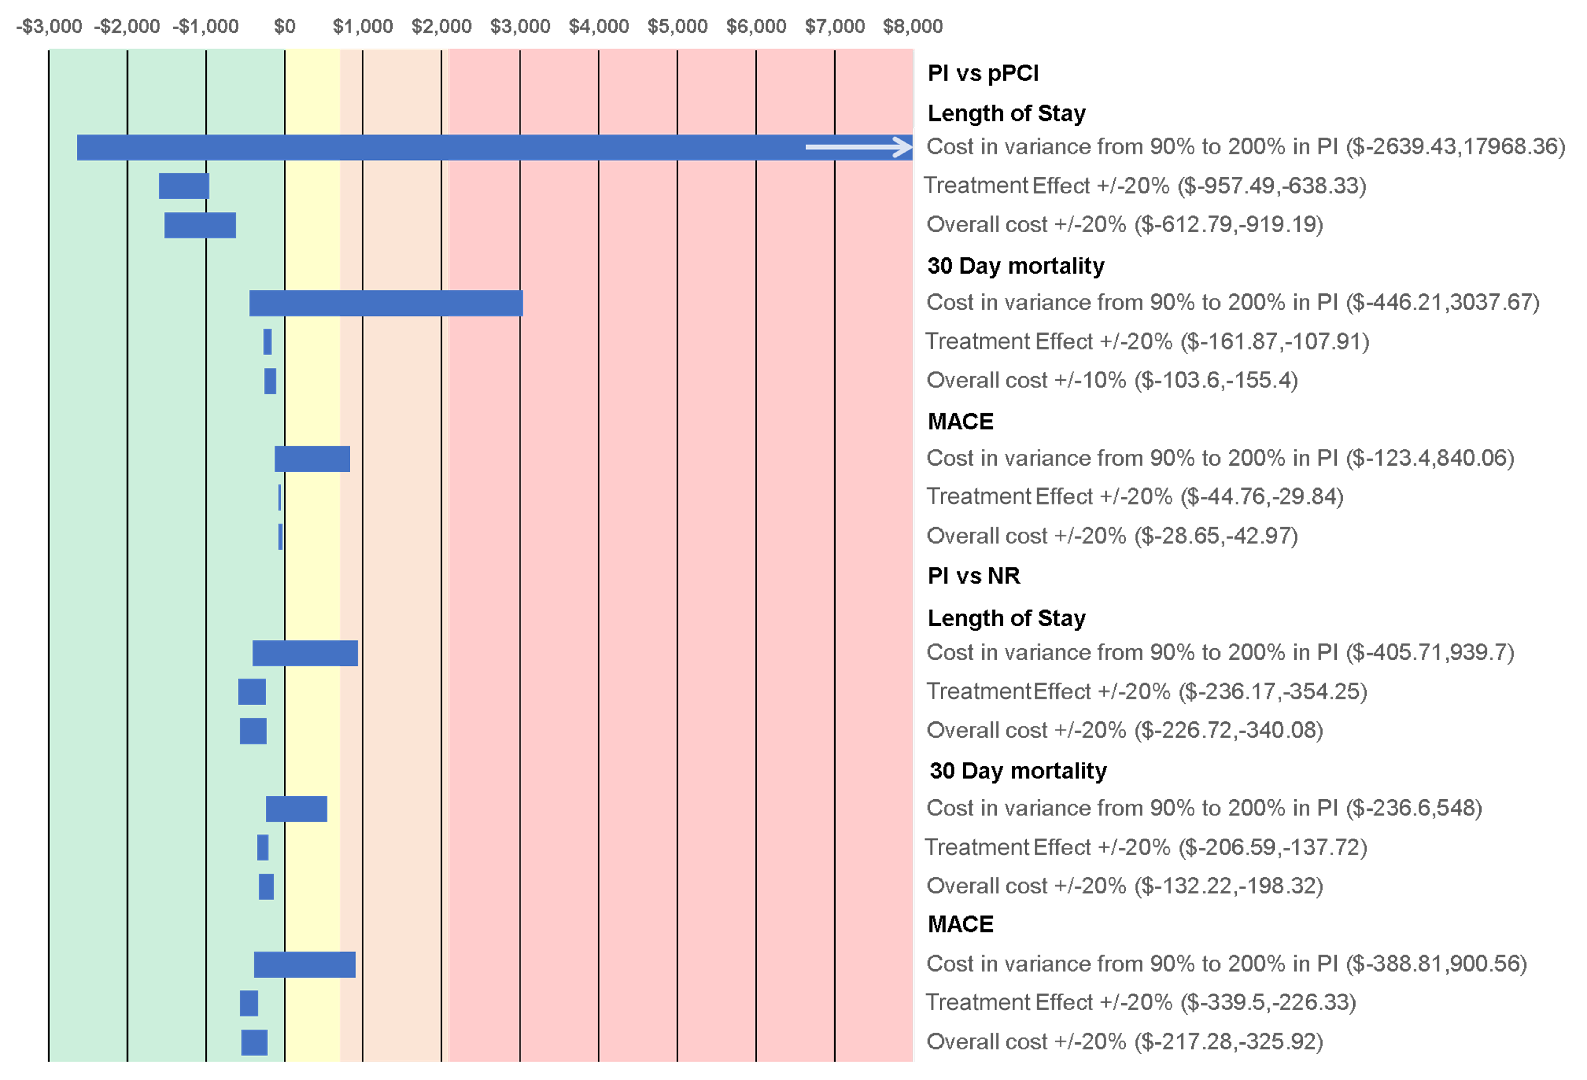


**Figure S3.** One-way tornado plot is color-coded to identify different willingness-to-pay (WTP) thresholds in $ US dollars.

. Green indicates a cost-saving ICER <0. Yellow indicates a very cost-effective 0–1× Mx-GDP. Orange indicates a WTP threshold 1–3× Mx-GDP. Red indicates variable inputs that exceed a WTP threshold (>3× Mx-GDP). Mx-GDP, Mexico’s monthly gross domestic product per capita.
